# Supplementary material for: Eocene-Oligocene terrestrial cryospheric processes: bipolar glaciation and uplifted Tibet
Source: Research Square preprint supplement (doi:10.21203/rs.3.rs-835656/v1), 2021-08-23
Supplement: Supplementary file 1 [file 2002c1290088fa4486c3b996.xlsx]

## Sheet: Sheet1
Age	Thickness	samples ID	Lithology	δ13CVPDB	δ18OVPDB
(Ma)	(M)
38.2985	20.9372	H1	Siltstone	2.124	-8.454
37.832	31.5647	H2	Argillaceous dolostone	2.057	-11.15
37.6354	36.0426	H3	Argillaceous dolostone	2.044	-4.76
37.1906	46.1733	H4	Dolomitic siltstone	2.465	-6.681
37.097	48.306	H5	Argillaceous dolostone	1.111	-4.892
36.9364	51.9648	H6	Arenaceous dolostone	2.226	-5.755
36.7984	55.109	H7	Argillaceous dolostone	2.603	-5.043
36.6665	58.1122	H8	Dolomitic siltstone	2.177	-5.379
36.5982	59.6697	H9	Arenaceous dolostone	3.408	-3.409
36.4908	62.1157	H10	Dolomitic siltstone	2.983	-4.342
36.3803	64.6332	H11	Argillaceous dolostone	1.965	-5.519
36.2837	66.833	H12	Dolomitic siltstone	2.969	-6.162
36.1738	69.3372	H13	Argillaceous dolostone	1.653	-4.434
36.0572	71.9935	H14	Arenaceous dolostone	3.145	-4.992
35.993	73.4548	H15	Dolomitic siltstone	3.043	-4.959
35.9303	74.8825	H16	Dolostone	2.089	-3.726
35.8326	77.1092	H17	Argillaceous dolostone	2.321	-4.955
35.7626	78.7025	H18	Dolomitic siltstone	3.091	-5.646
35.696	80.2198	H19	Dolomitic siltstone	3.017	-4.55
35.6169	82.0235	H20	Argillaceous dolostone	2.083	-4.697
35.5226	84.1695	H21	Dolomitic siltstone	0.693	-4.358
35.4515	85.7897	H22	Dolomitic siltstone	2.716	-5.722
35.288	89.5135	H23	Dolostone	3.065	-6.208
35.21	91.2903	H24	Dolomitic siltstone	3.317	-4.858
35.0574	94.7679	H25	Dolostone	2.854	-6.545
34.8465	99.5726	H26	Argillaceous dolostone	4.432	-3.127
34.6584	103.856	H27	Dolomitic siltstone	3.331	-6.246
34.4802	107.915	H28	Argillaceous dolostone	3.915	-4.647
34.0932	116.732	H29	Dolostone	4.079	-5.362
33.9841	119.216	H30	Dolomitic siltstone	1.16	-7.254
33.9087	120.935	H31	Dolostone	2.95	-6.109
33.8497	122.278	H32	Arenaceous dolostone	2.182	-8.762
33.778	123.911	H33	Dolomitic siltstone	3.802	-5.643
33.7041	125.594	H34	Arenaceous dolostone	2.511	-10.602
33.6355	127.158	H35	Dolomitic siltstone	3.361	-2.048
33.5784	128.459	H36	Dolostone	2.566	-9.63
33.422	132.021	H37	Dolomitic siltstone	0.577	-8.556
33.237	136.235	H38	Dolostone	3.451	-7.553
33.0453	140.601	H39	Dolomitic siltstone	1.239	-7.46
32.9417	142.962	H40	Dolostone bearing mudstone	1.093	-5.975
32.7945	146.314	H41	Dolostone	2.797	-9.326
32.6371	149.902	H42	Dolomitc argillaceous limestone	0.159	-7.299
32.4741	153.614	H43	Dolostone	2.154	-6.919
32.3503	156.434	H44	Dolomitic siltstone	1.503	-8.203
32.2563	158.575	H45	Dolostone	2.04	-4.918
32.1844	160.213	H46	Dolomitic siltstone	2.937	-2.737
32.1078	161.957	H47	Argillaceous dolostone	2.889	-2.252
32.0471	163.34	H48	Dolomitic siltstone	2.706	-4.312
31.9357	165.877	H49	Argillaceous dolostone	2.638	-4.379
31.8482	167.871	H50	Dolomitic siltstone	1.68	-7.532
31.7755	169.527	H51	Argillaceous dolostone	1.804	-5.428
31.725	170.678	H52	Dolomitic siltstone	2.043	-4.75
31.6654	172.036	H53	Argillaceous dolostone	1.209	-5.174
31.6031	173.455	H54	Dolomitic siltstone	1.808	-2.318
31.5482	174.706	H55	Argillaceous dolostone	1.508	-5.24
31.4962	175.89	H56	Calcareous siltstone	0.216	-6.171
31.4479	176.991	H57	Argillaceous dolostone	2.663	-2.886
31.3921	178.262	H58	Dolomitic-argillaceous siltstone	1.717	-2.554
31.3337	179.591	H59	Dolostone	1.226	-5.535
31.2907	180.571	H60	Dolomitic-argillaceous siltstone	1.483	-2.851
31.2478	181.549	H61	Argillaceous dolostone	0.89	-3.719
31.1857	182.963	H62	Dolomitic siltstone	1.867	-6.493
31.1408	183.986	H63	Dolomitic mudstone	-0.442	-4.014
31.0731	185.528	H64	Dolomitic mudstone	0.299	-8.49
31	187.193	H65	Dolostone	0.389	-7.108
30.708	193.844	H66	Dolomitic mudstone	-0.879	-7.352
30.4529	199.655	H67	Dolostone	-1.521	-8.808
