# Supplementary material for: Eocene-Oligocene terrestrial cryospheric processes: bipolar glaciation and uplifted Tibet
Source: Research Square preprint supplement (doi:10.21203/rs.3.rs-835656/v1), 2021-08-23
Supplement: Supplementary file 3 [file b78ddaa57febc45d5a468116.xlsx]

## Sheet: Sheet1
Analysis No.	Content(ppm)		Corrected isotopic ratios									Corrected ages (Ma)								Age (Ma)	1σ
	Th	U	Th/U	207Pb/206Pb	1σ	207Pb/235U	1σ	206Pb/238U	1σ	208Pb/232Th	1σ	207Pb/206Pb	1σ	207Pb/235U	1σ	206Pb/238U	1σ	208Pb/232Th	1σ
ZP01-102	569.695	551.276	1.03341	0.0491913	0.00502385	0.0388713	0.00381208	0.00578822	0.000110634	0.0020429	9.14197e-05	166.75	222.19	38.7215	3.72599	37.2057	0.70937	41.2495	1.84403	37.2057	0.70937	The mean age of seven youngest age of zircon
ZP01-166	1459.49	1218.77	1.19751	0.0503843	0.00359556	0.0395472	0.00247722	0.00581178	9.77164e-05	0.00183997	5.33624e-05	213.035	164.792	39.3818	2.41979	37.3567	0.626605	37.1557	1.07659	37.3567	0.626605
ZP01-143	433.319	639.802	0.67727	0.048168	0.004781	0.0390108	0.00309435	0.00585844	0.000130048	0.00282305	0.000147042	109.35	218.485	38.8578	3.0241	37.6558	0.833711	56.9797	2.96367	37.6558	0.833711	37.80 ± 0.59
ZP01-17	657.899	521.978	1.2604	0.0502973	0.00515363	0.0403135	0.0032376	0.00588179	0.000151569	0.00196527	8.99599e-05	209.33	222.2	40.1301	3.16013	37.8054	0.971578	39.6835	1.81472	37.8054	0.971578
ZP01-178	618.849	606.574	1.02024	0.0509162	0.00473143	0.041625	0.00331077	0.00596321	0.000115489	0.00188889	7.73764e-05	235.25	216.64	41.4093	3.22748	38.3272	0.740364	38.1426	1.561	38.3272	0.740364
ZP01-189	274.156	306.652	0.894031	0.0465454	0.00599294	0.0398965	0.00447808	0.00597866	0.000162826	0.00212665	0.000107336	33.43	275.89	39.723	4.3726	38.4261	1.04361	42.9386	2.1649	38.4261	1.04361
ZP01-182	1113.83	723.81	1.53884	0.0510679	0.00465794	0.0412197	0.00299693	0.00605852	0.000138886	0.00196764	7.19177e-05	242.66	211.085	41.0142	2.9227	38.9379	0.890176	39.7313	1.45076	38.9379	0.890176
ZP01-09	244.416	382.44	0.639098	0.0531865	0.00632894	0.0454757	0.00427285	0.00637482	0.000153582	0.00207822	0.000111374	344.5	272.188	45.1561	4.14997	40.9643	0.98403	41.962	2.24645	40.9643	0.98403
ZP01-18	774.622	1940.41	0.399206	0.0470296	0.00254963	0.0421315	0.00215818	0.00655239	8.73163e-05	0.00197394	5.99045e-05	50.095	125.915	41.903	2.10298	42.1016	0.559674	39.8584	1.20842	42.1016	0.559674
ZP01-145	113.46	107.035	1.06003	0.0481089	0.00912069	0.0468231	0.00454692	0.00755699	0.000344844	0.00237254	0.00015375	105.645	396.245	46.4639	4.41047	48.5323	2.20649	47.8974	3.10028	48.5323	2.20649
ZP01-204	475.34	254.608	1.86695	0.0506958	0.00594118	0.054718	0.00500176	0.00782104	0.000218625	0.00269109	0.00010187	227.845	248.125	54.0929	4.81536	50.2215	1.39867	54.3199	2.05349	50.2215	1.39867
ZP01-206	135.691	122.979	1.10336	0.0598777	0.00816527	0.0562859	0.00532228	0.00801307	0.000289224	0.00238295	0.00012692	598.17	298.882	55.6012	5.11632	51.4497	1.84985	48.1075	2.55924	51.4497	1.84985
ZP01-32	125.438	177.948	0.704914	0.0476725	0.00665993	0.0547163	0.00625346	0.00883591	0.000211476	0.00281866	0.000154051	83.425	299.96	54.0913	6.02036	56.7098	1.35167	56.8913	3.10497	56.7098	1.35167
ZP01-03	283.934	257.409	1.10305	0.0529176	0.00447701	0.105801	0.00801341	0.0145175	0.000262725	0.00450803	0.000177706	324.13	192.567	102.117	7.3585	92.9128	1.67016	90.9125	3.57572	92.9128	1.67016
ZP01-130	290.064	649.117	0.44686	0.0518697	0.00273542	0.111234	0.00550661	0.0156144	0.000203723	0.00515583	0.000188478	279.69	120.353	107.094	5.03216	99.8789	1.29421	103.943	3.79001	99.8789	1.29421
ZP01-168	673.038	844.534	0.796935	0.0464584	0.00220853	0.10284	0.00501598	0.0159358	0.000214409	0.00490573	0.000126055	20.47	111.1	99.3944	4.6187	101.919	1.3616	98.9132	2.53541	101.919	1.3616
ZP01-128	253.513	471.882	0.537238	0.04806	0.00352797	0.107251	0.00731969	0.0164399	0.000262053	0.00520465	0.000214458	101.94	231.45	103.447	6.71275	105.117	1.66295	104.925	4.31223	105.117	1.66295
ZP01-144	136.322	297.751	0.457839	0.0466439	0.0045758	0.106566	0.00816999	0.017147	0.000332056	0.0058075	0.000250128	31.58	218.485	102.819	7.4971	109.6	2.10532	117.043	5.02645	109.6	2.10532
ZP01-12	318.644	311.334	1.02348	0.0528225	0.00342849	0.124127	0.00725243	0.0171735	0.000292019	0.0052531	0.000161739	320.43	148.127	118.806	6.55136	109.768	1.85164	105.899	3.25202	109.768	1.85164
ZP01-19	133.59	221.223	0.603871	0.0480624	0.00378535	0.11597	0.0085006	0.0173002	0.000306622	0.00577366	0.000231173	101.94	177.75	111.412	7.73478	110.57	1.94392	116.363	4.6457	110.57	1.94392
ZP01-01	201.245	330.565	0.608791	0.0537437	0.00330369	0.128	0.00735527	0.0174248	0.000295001	0.00589649	0.000216086	361.165	138.873	122.299	6.62145	111.36	1.8701	118.831	4.34197	111.36	1.8701
ZP01-51	363.952	513.536	0.708717	0.0465065	0.00293316	0.112147	0.00645108	0.017451	0.00024245	0.00581967	0.000172502	33.43	135.17	107.928	5.89025	111.526	1.53731	117.287	3.46648	111.526	1.53731
ZP01-25	143.276	205.135	0.698445	0.0473379	0.00464643	0.117246	0.00992095	0.0179759	0.000344502	0.00552401	0.000242076	64.91	218.485	112.572	9.01675	114.851	2.18247	111.345	4.86602	114.851	2.18247
ZP01-177	68.6357	59.4911	1.15371	0.0565564	0.00931095	0.127807	0.0126798	0.0180169	0.000605967	0.00515393	0.000296238	475.97	569.398	122.126	11.4162	115.111	3.83768	103.905	5.95694	115.111	3.83768
ZP01-124	228.363	317.187	0.719963	0.0530511	0.00346851	0.133532	0.00796028	0.0185236	0.000288261	0.00629862	0.000235134	331.54	148.127	127.267	7.1311	118.318	1.82557	126.91	4.72284	118.318	1.82557
ZP01-162	478.386	615.018	0.777841	0.0521181	0.00302017	0.137338	0.00792113	0.0190272	0.000286925	0.00688409	0.000207691	300.06	131.463	130.67	7.07232	121.505	1.81629	138.666	4.16921	121.505	1.81629
ZP01-159	278.758	325.976	0.855149	0.0470261	0.00316735	0.128066	0.00768611	0.0199492	0.000305189	0.00653409	0.000198253	50.095	161.09	122.358	6.91884	127.335	1.93012	131.639	3.98113	127.335	1.93012
ZP01-183	801.2	909.563	0.880863	0.0534658	0.00297473	0.148652	0.00654294	0.0200666	0.000254001	0.00707938	0.000178711	350.055	130.54	140.721	5.7846	128.077	1.60668	142.586	3.58676	128.077	1.60668
ZP01-69	319.186	305.578	1.04453	0.0534238	0.00348405	0.15971	0.00920743	0.0216312	0.000342293	0.00738846	0.00024066	346.35	148.13	150.449	8.06221	137.957	2.16113	148.788	4.82859	137.957	2.16113
ZP01-165	514.897	470.195	1.09507	0.0549368	0.00385932	0.162192	0.0100939	0.0217495	0.000338405	0.00709113	0.000219226	409.31	159.243	152.62	8.81947	138.703	2.13638	142.822	4.39984	138.703	2.13638
ZP01-137	332.663	288.134	1.15454	0.051411	0.00357653	0.154324	0.0096361	0.0220722	0.000384969	0.0069536	0.000208709	257.47	156.46	145.722	8.47682	140.739	2.42927	140.061	4.18934	140.739	2.42927
ZP01-150	194.424	387.005	0.50238	0.0465004	0.00286011	0.142769	0.00845184	0.0223825	0.000310799	0.00715403	0.000249457	33.43	131.47	135.507	7.51027	142.696	1.96119	144.084	5.00627	142.696	1.96119
ZP01-83	514.315	581.833	0.883958	0.0547246	0.00273439	0.170888	0.00801277	0.022765	0.000305911	0.00695469	0.000214975	466.71	112.953	160.189	6.94945	145.107	1.92973	140.083	4.31512	145.107	1.92973
ZP01-201	134.437	215.845	0.622841	0.0512654	0.00410381	0.167373	0.0120014	0.0238277	0.000379932	0.00724052	0.000262265	253.77	185.162	157.137	10.4394	151.802	2.3936	145.82	5.26285	151.802	2.3936
ZP01-40	529.237	954.647	0.55438	0.0536815	0.00296168	0.175073	0.006622	0.023868	0.000270052	0.00878463	0.000238393	366.72	124.062	163.812	5.72316	152.055	1.70227	176.782	4.77649	152.055	1.70227
ZP01-167	203.034	263.849	0.769507	0.0496641	0.00338456	0.164019	0.00873929	0.0242739	0.000396384	0.00881122	0.000287663	188.97	159.24	154.215	7.62408	154.611	2.4961	177.314	5.76353	154.611	2.4961
ZP01-97	319.722	570.262	0.560658	0.054485	0.00284526	0.188434	0.00927977	0.0252545	0.000304163	0.00882934	0.000257571	390.79	86.1025	175.292	7.92942	160.779	1.91443	177.677	5.16053	160.779	1.91443
ZP01-45	112.376	214.165	0.524715	0.0474044	0.00332041	0.167302	0.0106701	0.0261668	0.000468998	0.0084868	0.000363476	77.87	149.975	157.075	9.28205	166.513	2.94763	170.813	7.28483	166.513	2.94763
ZP01-35	78.1166	150.247	0.519921	0.0472708	0.00403941	0.168028	0.0117323	0.0263814	0.000517104	0.00884225	0.000402184	61.205	192.565	157.706	10.1996	167.861	3.24905	177.936	8.05778	167.861	3.24905
ZP01-26	264.606	223.982	1.18138	0.0470306	0.00320067	0.172621	0.0109241	0.0268019	0.00043429	0.00853502	0.00022105	50.095	155.535	161.691	9.45991	170.502	2.72809	171.78	4.4301	170.502	2.72809
ZP01-158	1283.07	1121.16	1.14442	0.0531697	0.00224863	0.197048	0.00637022	0.0268752	0.000261095	0.00870853	0.000163241	344.5	94.435	182.625	5.4049	170.961	1.64168	175.257	3.27099	170.961	1.64168
ZP01-109	345.101	806.284	0.428015	0.0499967	0.00208445	0.191896	0.00782156	0.0278173	0.000330365	0.00835257	0.000226317	194.525	102.763	178.245	6.66434	176.873	2.07423	168.123	4.53648	176.873	2.07423
ZP01-148	149.137	196.635	0.758446	0.0558768	0.00439287	0.223182	0.0145547	0.029338	0.000541384	0.00864362	0.000291356	455.6	175.903	204.555	12.0829	186.404	3.39201	173.956	5.83848	186.404	3.39201
ZP01-172	345.341	587.654	0.587659	0.0478217	0.00227414	0.195821	0.00924474	0.029545	0.000334831	0.00914504	0.00026171	100.09	98.14	181.584	7.85077	187.7	2.09897	184.001	5.24181	187.7	2.09897
ZP01-61	199.255	522.376	0.38144	0.0491492	0.00230211	0.221484	0.0104894	0.0325308	0.000360028	0.011058	0.000345087	153.79	109.243	203.144	8.7206	206.368	2.25053	222.28	6.89868	206.368	2.25053
ZP01-131	142.503	339.956	0.41918	0.0551674	0.00296001	0.247897	0.0126606	0.0328648	0.000440613	0.00999699	0.000370182	420.42	152.76	224.866	10.3028	208.453	2.7523	201.058	7.40814	208.453	2.7523
ZP01-66	231.151	764.913	0.302192	0.0564022	0.00236926	0.278657	0.00932508	0.0357805	0.000346256	0.0133023	0.000363118	477.82	97.2125	249.591	7.407	226.626	2.15847	267.097	7.24308	226.626	2.15847
ZP01-108	506.456	809.866	0.625358	0.05201	0.00178205	0.257969	0.00850448	0.0359249	0.0003647	0.0105256	0.000233645	287.1	77.7675	233.029	6.86631	227.524	2.2728	211.635	4.67329	227.524	2.2728
ZP01-58	265.441	356.598	0.744372	0.0544913	0.00283768	0.271784	0.0126584	0.0364183	0.000448136	0.012207	0.000319972	390.79	86.1025	244.119	10.1077	230.594	2.79014	245.237	6.38936	230.594	2.79014
ZP01-43	285.331	215.433	1.32445	0.0518655	0.00288077	0.267516	0.0133408	0.0378754	0.000546336	0.0109104	0.000268562	279.69	160.165	240.706	10.6883	239.65	3.39585	219.33	5.36964	239.65	3.39585
ZP01-68	266.886	244.516	1.09149	0.0502072	0.00269025	0.261072	0.013336	0.0379063	0.000525323	0.0129047	0.000368032	211.185	124.055	235.53	10.739	239.842	3.26534	259.164	7.34397	239.842	3.26534
ZP01-153	267.688	438.581	0.610351	0.0535303	0.00276478	0.282954	0.0120997	0.0383338	0.0004496	0.0137181	0.000389776	350.055	116.655	252.998	9.57774	242.497	2.79438	275.388	7.77164	242.497	2.79438
ZP01-129	144.263	643.64	0.224136	0.0567834	0.00270829	0.301234	0.0108574	0.0383541	0.000378266	0.0162716	0.000676011	483.375	103.69	267.364	8.47422	242.623	2.35204	326.239	13.4449	242.623	2.35204
ZP01-86	842.165	708.595	1.1885	0.0529474	0.0019373	0.28706	0.010084	0.0391435	0.00038512	0.0120564	0.000293435	327.835	83.325	256.243	7.95732	247.522	2.39286	242.23	5.86032	247.522	2.39286
ZP01-112	362.49	804.881	0.450365	0.0511833	0.00222792	0.278602	0.0116266	0.0394226	0.000509296	0.0120036	0.000361761	250.065	99.985	249.548	9.23467	249.253	3.16148	241.174	7.22527	249.253	3.16148
ZP01-107	197.544	280.945	0.703144	0.0526474	0.00251541	0.284377	0.0132136	0.0394914	0.000546224	0.012975	0.000393195	322.28	104.618	254.123	10.4477	249.68	3.3901	260.566	7.84555	249.68	3.3901
ZP01-53	417.266	817.464	0.51044	0.0483431	0.00153199	0.266198	0.00809598	0.0397362	0.000341054	0.0129343	0.000270899	116.755	75.9175	239.65	6.49433	251.197	2.1189	259.754	5.40556	251.197	2.1189
ZP01-11	114.84	816.376	0.14067	0.0514078	0.00160906	0.289308	0.00902713	0.0404843	0.000374568	0.0136487	0.000484542	257.47	70.3575	258.014	7.1114	255.834	2.32478	274.004	9.6618	255.834	2.32478
ZP01-154	123.846	333.096	0.371804	0.0558311	0.00352076	0.319357	0.0227385	0.0406365	0.00117848	0.0076531	0.000416013	455.6	145.352	281.408	17.5007	256.777	7.30163	154.097	8.34469	256.777	7.30163
ZP01-180	130.568	204.272	0.639189	0.0523126	0.00332105	0.293654	0.0173811	0.0411589	0.000683274	0.0129359	0.000437064	298.21	146.278	261.432	13.6435	260.013	4.23287	259.786	8.72122	260.013	4.23287
ZP01-81	92.1535	378.4	0.243535	0.0574169	0.00298522	0.339447	0.0141313	0.0427882	0.000579846	0.0200416	0.000956914	509.3	112.948	296.753	10.7143	270.092	3.58751	401.08	18.9614	270.092	3.58751
ZP01-48	202.897	393.414	0.515735	0.0514759	0.00215205	0.312818	0.0136474	0.0437561	0.000478245	0.0132951	0.000366099	261.175	94.43	276.363	10.5571	276.073	2.95748	266.953	7.30259	276.073	2.95748
ZP01-200	48.1824	54.0185	0.89196	0.0606503	0.00697129	0.342743	0.0280041	0.0441453	0.00108898	0.0139349	0.000737039	627.795	245.34	299.248	21.1777	278.476	6.72488	279.711	14.6925	278.476	6.72488
ZP01-96	261.356	400.011	0.653371	0.055468	0.00209882	0.344707	0.0131563	0.0449774	0.000521394	0.0156453	0.000369552	431.53	87.955	300.732	9.93637	283.612	3.2201	313.778	7.35441	283.612	3.2201
ZP01-56	53.0393	116.38	0.455744	0.0518776	0.00356426	0.329956	0.0214936	0.0466111	0.000792202	0.0184496	0.000891988	279.69	154.61	289.532	16.4109	293.682	4.882	369.509	17.7025	293.682	4.882
ZP01-82	24.6219	1310.44	0.018789	0.057123	0.00174185	0.374635	0.0117138	0.047382	0.000762273	0.013973	0.00090159	494.485	66.66	323.083	8.65526	298.429	4.6944	280.471	17.972	298.429	4.6944
ZP01-116	116.909	155.308	0.752756	0.0572819	0.00336367	0.378565	0.0216854	0.0482339	0.000672804	0.014126	0.000449063	501.89	129.613	325.981	15.974	303.67	4.14085	283.521	8.95013	303.67	4.14085
ZP01-20	35.3738	74.4663	0.47503	0.0543159	0.00440544	0.393858	0.0287958	0.0535213	0.000990594	0.0152295	0.000777082	383.385	187.94	337.184	20.9781	336.104	6.06409	305.502	15.4709	336.104	6.06409
ZP01-151	43.9225	244.007	0.180006	0.053028	0.00292969	0.40018	0.0217227	0.0554588	0.00109479	0.0179072	0.00079211	331.54	125.907	341.779	15.7546	347.949	6.68929	358.741	15.7287	347.949	6.68929
ZP01-152	105.673	810.119	0.130442	0.0595274	0.00184866	0.46409	0.0128617	0.0560552	0.000677047	0.0240501	0.000691629	587.065	68.5075	387.098	8.92378	351.591	4.13721	480.353	13.6511	351.591	4.13721
ZP01-73	296.808	659.582	0.449994	0.0616484	0.002372	0.555718	0.0151241	0.065385	0.000730956	0.0238464	0.000545105	661.125	83.32	448.736	9.87585	408.291	4.42835	476.331	10.7612	408.291	4.42835
ZP01-117	397.029	232.378	1.70855	0.0550986	0.00235558	0.499038	0.0204862	0.0658882	0.000794807	0.0200943	0.000452751	416.715	96.2875	411.051	13.8793	411.335	4.81206	402.124	8.97084	411.335	4.81206
ZP01-79	58.005	603.717	0.0960797	0.0623134	0.00213388	0.565197	0.0175296	0.0659332	0.00063329	0.0327767	0.00177415	683.345	78.695	454.903	11.3761	411.608	3.83637	651.865	34.7216	411.608	3.83637
ZP01-100	107.244	168.615	0.636027	0.0564074	0.00288501	0.512652	0.0257353	0.0663168	0.000878124	0.0204554	0.000595298	477.82	119.43	420.231	17.2775	413.927	5.3134	409.277	11.7911	413.927	5.3134
ZP01-94	94.5708	246.377	0.383845	0.0529448	0.00189146	0.487042	0.0169792	0.0665194	0.000694781	0.0228467	0.000831171	327.835	81.4725	402.893	11.597	415.152	4.20548	456.586	16.4246	415.152	4.20548
ZP01-142	228.457	385.43	0.592732	0.0558912	0.00196819	0.515401	0.0172931	0.0667025	0.000637528	0.0204184	0.000484254	455.6	77.77	422.075	11.5907	416.259	3.85933	408.545	9.59199	416.259	3.85933
ZP01-37	19.1578	355.467	0.0538947	0.0568812	0.00198888	0.524815	0.0171162	0.0669989	0.000742637	0.0248395	0.00140761	487.08	75.9175	428.363	11.4015	418.05	4.49242	495.928	27.7614	418.05	4.49242
ZP01-80	262.12	327.119	0.801298	0.0571761	0.00220485	0.532355	0.0209663	0.0671452	0.000748596	0.0200134	0.000506587	498.19	89.8025	433.371	13.896	418.933	4.52777	400.522	10.0384	418.933	4.52777
ZP01-63	161.712	286.729	0.563988	0.0617494	0.00264825	0.57276	0.0212507	0.0672362	0.000773652	0.0233603	0.000831191	664.83	90.7275	459.798	13.7231	419.483	4.67857	466.734	16.4167	419.483	4.67857
ZP01-44	218.24	454.467	0.480212	0.0589707	0.00209375	0.549983	0.0194956	0.0672924	0.000653078	0.0231485	0.000609885	564.85	77.765	444.985	12.775	419.822	3.95108	462.55	12.0482	419.822	3.95108
ZP01-105	333.942	277.182	1.20478	0.0554293	0.00211193	0.518655	0.0197802	0.0677722	0.000738943	0.0205297	0.000442808	427.825	89.805	424.252	13.2283	422.72	4.46702	410.749	8.7701	422.72	4.46702
ZP01-194	73.5903	688.822	0.106835	0.055597	0.00155837	0.520958	0.0163945	0.0677774	0.00127087	0.0213521	0.000790158	435.23	62.9575	425.791	10.9487	422.752	7.6759	427.03	15.637	422.752	7.6759
ZP01-169	165.763	320.036	0.517952	0.0561437	0.0017169	0.528134	0.0169531	0.0678261	0.000746825	0.0202916	0.000551424	457.45	68.51	430.57	11.2685	423.046	4.51433	406.033	10.9238	423.046	4.51433
ZP01-47	145.04	277.633	0.522418	0.059828	0.00234831	0.571367	0.0223904	0.0693248	0.000903774	0.0239218	0.000619577	598.17	85.17	458.898	14.4715	432.087	5.45339	477.82	12.2304	432.087	5.45339
ZP01-185	121.1	151.638	0.798615	0.0534196	0.00313852	0.510564	0.0296004	0.0693578	0.000997674	0.0216222	0.00062001	346.35	133.32	418.828	19.899	432.285	6.01881	432.375	12.2666	432.285	6.01881
ZP01-207	88.5984	474.199	0.186838	0.0549155	0.00246351	0.523824	0.0178621	0.0696725	0.000948735	0.0302418	0.00158612	409.31	99.99	427.703	11.9058	434.182	5.72239	602.193	31.118	434.182	5.72239
ZP01-176	235.617	397.177	0.593229	0.0592297	0.00200733	0.569592	0.018753	0.0697485	0.000691895	0.0225579	0.000484084	575.96	76.84	457.751	12.1355	434.641	4.17603	450.879	9.56857	434.641	4.17603
ZP01-136	254.947	324.464	0.785749	0.0592312	0.00219809	0.576264	0.0212433	0.0702796	0.000682072	0.0223686	0.000498243	575.96	79.6175	462.058	13.6879	437.84	4.11499	447.137	9.85026	437.84	4.11499
ZP01-193	45.6302	55.0067	0.829539	0.0568971	0.0049466	0.561228	0.0420055	0.0726851	0.00144253	0.0258293	0.00108045	487.08	224.972	452.325	27.321	452.312	8.67247	515.44	21.2884	452.312	8.67247
ZP01-184	66.3887	950.169	0.0698704	0.0613614	0.00195337	0.631035	0.0190307	0.0742471	0.000709921	0.0361229	0.00158295	653.72	68.51	496.741	11.8521	461.692	4.26743	717.247	30.8796	461.692	4.26743
ZP01-76	28.224	67.4859	0.41822	0.0634181	0.0060808	0.661317	0.0540655	0.0756572	0.00162323	0.0265415	0.00155766	724.08	208.312	515.419	33.0462	470.149	9.73135	529.468	30.6697	470.149	9.73135
ZP01-23	217.321	459.222	0.473238	0.0574796	0.00161069	0.620444	0.017407	0.0781759	0.000882857	0.0245089	0.000540722	509.3	58.3275	490.126	10.9125	485.226	5.2851	489.406	10.6677	485.226	5.2851
ZP01-134	207.818	592.587	0.350697	0.0644895	0.00195188	0.746775	0.0220589	0.0838091	0.000832822	0.0256495	0.000656688	766.67	64.04	566.352	12.8284	518.819	4.96148	511.896	12.9412	518.819	4.96148
ZP01-91	49.385	161.464	0.305858	0.0657547	0.00250767	0.881288	0.0324078	0.0969893	0.00120962	0.0356158	0.0012009	798.15	79.625	641.678	17.4968	596.741	7.1156	707.353	23.4381	596.741	7.1156
ZP01-104	472.185	734.931	0.642489	0.0640319	0.00163518	0.863576	0.0226821	0.097324	0.00104304	0.0273485	0.000646961	742.6	53.6975	632.073	12.366	598.708	6.13602	545.35	12.7284	598.708	6.13602
ZP01-141	141.394	899.152	0.157253	0.0600452	0.00163162	0.815133	0.0212925	0.0979113	0.000967721	0.0296675	0.000722485	605.575	58.17	605.33	11.9181	602.157	5.69129	590.923	14.1823	602.157	5.69129
ZP01-114	201.665	239.37	0.842481	0.0634008	0.0029422	0.958202	0.0366609	0.108816	0.00131103	0.0373825	0.00096979	720.38	98.1375	682.365	19.0154	665.867	7.63052	741.803	18.8953	665.867	7.63052
ZP01-126	60.5059	252.981	0.239172	0.0728505	0.00282143	1.19962	0.0501096	0.118963	0.00204001	0.0401164	0.00135614	1009.26	78.86	800.412	23.1378	724.595	11.7591	795	26.3534	724.595	11.7591
ZP01-85	132.346	121.552	1.0888	0.0701802	0.0038518	1.18475	0.0531559	0.121054	0.00152349	0.0423043	0.00118851	1000	112.968	793.525	24.7105	736.625	8.76955	837.473	23.0474	736.625	8.76955
ZP01-147	98.7681	148.932	0.663177	0.0645745	0.0027003	1.08705	0.0439622	0.121538	0.0013504	0.0381489	0.000997013	761.115	61.105	747.071	21.3943	739.408	7.77216	756.73	19.4113	739.408	7.77216
ZP01-115	42.1197	45.0837	0.934256	0.0749399	0.00469787	1.24779	0.0658424	0.122502	0.00226174	0.0439113	0.00169376	1133.34	93.9825	822.406	29.7479	744.947	12.9952	868.611	32.7947	744.947	12.9952
ZP01-05	86.6117	385.052	0.224935	0.0674885	0.00193166	1.15424	0.0338661	0.122661	0.00127984	0.0362496	0.000920181	853.7	64.97	779.243	15.9713	745.86	7.35999	719.718	17.9483	745.86	7.35999
ZP01-202	131.051	91.5239	1.43188	0.0682121	0.0033493	1.16837	0.0557583	0.125265	0.00171571	0.0377829	0.000890664	875.925	102.625	785.884	26.1154	760.798	9.83753	749.604	17.3469	760.798	9.83753
ZP01-90	63.8268	164.464	0.38809	0.0638506	0.0021455	1.13002	0.0376631	0.127735	0.00146718	0.0393041	0.00122918	736.73	70.3625	767.765	17.9616	774.933	8.39717	779.209	23.9048	774.933	8.39717
ZP01-50	133.472	312.918	0.42654	0.0651485	0.00202325	1.21203	0.0347412	0.133997	0.00122711	0.0451262	0.00109007	788.89	60.18	806.123	15.9566	810.626	6.98944	892.119	21.0813	810.626	6.98944
ZP01-98	65.7667	339.484	0.193726	0.070149	0.00200472	1.3757	0.0445682	0.141197	0.00234637	0.0439062	0.00134839	933.02	59.2625	878.605	19.0579	851.428	13.2622	868.512	26.1077	851.428	13.2622
ZP01-173	331.998	1618.91	0.205076	0.0719244	0.00146138	1.41072	0.0345769	0.141368	0.00207588	0.0458875	0.00087716	983.335	45.3725	893.463	14.5763	852.394	11.7335	906.838	16.9515	852.394	11.7335
ZP01-54	103.829	82.3069	1.26149	0.0777436	0.00385356	1.5388	0.0677015	0.143442	0.00206978	0.0488395	0.00138513	1140.44	98.605	946.023	27.0846	864.096	11.6782	963.806	26.6929	864.096	11.6782
ZP01-198	69.6074	225.203	0.309088	0.0670102	0.00188626	1.38821	0.039497	0.149412	0.00142083	0.0434795	0.00112178	838.885	53.24	883.938	16.8034	897.664	7.98338	860.248	21.7289	897.664	7.98338
ZP01-160	166.808	364.221	0.457985	0.070548	0.00188087	1.47899	0.0390036	0.151273	0.00128536	0.0459217	0.000974197	944.13	54.785	921.817	15.988	908.093	7.21391	907.498	18.8262	908.093	7.21391
ZP01-135	111.878	218.225	0.51267	0.071063	0.00241496	1.51045	0.0510968	0.153587	0.0015471	0.049047	0.0012337	958.95	70.37	934.623	20.6765	921.038	8.65971	967.805	23.77	921.038	8.65971
ZP01-179	678.274	289.53	2.34267	0.0680114	0.00178086	1.46098	0.0370159	0.155086	0.00136708	0.0458436	0.000747812	877.775	55.555	914.413	15.2852	929.41	7.64602	905.99	14.4524	929.41	7.64602
ZP01-157	211.495	460.904	0.458869	0.0796639	0.00222401	1.73339	0.0533813	0.156243	0.00139415	0.0544992	0.00120492	1188.58	55.0875	1021.01	19.8419	935.866	7.78923	1072.58	23.0955	935.866	7.78923
ZP01-10	106.628	549.23	0.19414	0.0723758	0.00175182	1.60293	0.0409472	0.158754	0.00169563	0.0471832	0.00105459	998.15	54.635	971.355	15.9868	949.846	9.44714	931.863	20.3553	949.846	9.44714
ZP01-175	84.4317	356.714	0.236693	0.0712905	0.00206647	1.56395	0.0444746	0.158817	0.001626	0.0475273	0.00128409	964.81	63.89	956.034	17.6249	950.197	9.05987	938.503	24.7767	950.197	9.05987
ZP01-55	257.484	438.148	0.587665	0.0684538	0.00179003	1.51495	0.0377632	0.159097	0.00139718	0.0471059	0.0010319	883.33	86.1125	936.441	15.2598	951.758	7.7875	930.371	19.9187	951.758	7.7875
ZP01-22	122.985	115.667	1.06327	0.0783178	0.00304743	1.73681	0.0696942	0.160102	0.00208576	0.0507488	0.00142733	1155.25	77.775	1022.28	25.8665	957.344	11.6016	1000.57	27.4562	957.344	11.6016
ZP01-139	422.646	529.471	0.798243	0.0754891	0.00192005	1.71886	0.0457009	0.16395	0.00191121	0.0496355	0.000890371	1083.34	50.0025	1015.6	17.0814	978.692	10.5982	979.14	17.1454	978.692	10.5982
ZP01-84	165.792	207.866	0.797594	0.0722802	0.00275603	1.6584	0.0593142	0.165548	0.00182576	0.0525456	0.00157925	994.445	77.4725	992.766	22.6652	987.535	10.112	1035.1	30.3267	987.535	10.112
ZP01-89	265.457	323.128	0.821523	0.0740699	0.00177999	1.78258	0.0417572	0.173049	0.00136418	0.0540851	0.00100156	1042.6	52.7775	1039.12	15.2539	1028.89	7.51733	1064.64	19.2051	1042.6	52.7775
ZP01-101	132.875	270.108	0.491933	0.0760747	0.0018894	1.92811	0.0469407	0.183158	0.0015778	0.0536861	0.00113076	1098.15	45.37	1090.88	16.2945	1084.2	8.61653	1056.99	21.6906	1098.15	45.37
ZP01-33	124.695	179.989	0.69279	0.0777389	0.00209936	1.9794	0.0505677	0.184497	0.00172292	0.0545978	0.00104371	1140.44	53.7025	1108.52	17.25	1091.49	9.39522	1074.47	20.0036	1140.44	53.7025
ZP01-64	120.749	158.017	0.764153	0.0787153	0.00251443	2.08069	0.0652158	0.191119	0.0017133	0.0576548	0.00122241	1164.82	62.9625	1142.46	21.5089	1127.44	9.29245	1132.98	23.3607	1164.82	62.9625
ZP01-71	109.058	179.69	0.606921	0.0840743	0.00243556	2.04319	0.0589131	0.175461	0.00214633	0.0529672	0.00132151	1294.44	56.6375	1130.03	19.6718	1042.13	11.7843	1043.19	25.3671	1294.44	56.6375
ZP01-95	7.36899	414.573	0.0177749	0.0840966	0.00162357	2.63494	0.0535394	0.225722	0.00226933	0.0635258	0.00392611	1294.44	37.04	1310.45	14.9822	1312.04	11.9561	1244.86	74.6154	1294.44	37.04
ZP01-49	50.1987	71.6597	0.700516	0.086279	0.0033015	3.11708	0.114603	0.260032	0.00286298	0.0800553	0.00217579	1346.29	69.445	1436.91	28.2811	1490	14.6693	1556.59	40.7179	1346.29	69.445
ZP01-203	98.8873	367.367	0.269178	0.0871314	0.00212464	2.83549	0.0680093	0.23522	0.00211433	0.0667794	0.00155392	1364.81	46.4525	1364.98	18.0283	1361.8	11.0588	1306.6	29.4422	1364.81	46.4525
ZP01-39	76.8115	103.511	0.742062	0.0965256	0.00296235	3.74757	0.104877	0.282113	0.00306988	0.0765032	0.00155085	1557.72	57.7125	1581.59	22.4562	1602	15.4594	1490.01	29.1185	1557.72	57.7125
ZP01-27	43.846	64.9733	0.67483	0.0966894	0.00345463	3.78197	0.130389	0.284809	0.00332356	0.0781686	0.00207542	1561.42	66.665	1588.92	27.7074	1615.54	16.6985	1521.25	38.9076	1561.42	66.665
ZP01-31	165.963	171.845	0.965772	0.097609	0.00224272	3.68079	0.083031	0.272852	0.00288692	0.0770865	0.00154328	1588.89	42.8975	1567.21	18.0431	1555.26	14.645	1500.95	28.9607	1588.89	42.8975
ZP01-36	101.406	91.1865	1.11207	0.0987155	0.00324154	3.5933	0.112233	0.263787	0.00288278	0.0754597	0.00172723	1599.69	61.105	1548.05	24.8323	1509.19	14.7272	1470.4	32.4616	1599.69	61.105
ZP01-155	32.7871	54.4526	0.602122	0.0990145	0.00326751	4.0507	0.140978	0.295208	0.00369424	0.0847797	0.00236135	1605.87	61.4125	1644.44	28.364	1667.5	18.4087	1644.81	43.998	1605.87	61.4125
ZP01-59	43.8314	81.1419	0.540183	0.101252	0.00282581	4.36364	0.111438	0.312993	0.00325539	0.0891116	0.00222786	1647.21	51.545	1705.48	21.1281	1755.42	16.0111	1725.36	41.3457	1647.21	51.545
ZP01-196	117.181	186.308	0.628968	0.102887	0.00259478	4.47468	0.11613	0.313464	0.00341906	0.093428	0.00217448	1676.85	47.375	1726.29	21.5705	1757.73	16.8074	1805.31	40.1956	1676.85	47.375
ZP01-103	50.356	77.9672	0.645861	0.104894	0.00334403	4.45026	0.137922	0.307606	0.00348935	0.087503	0.00223137	1722.22	58.18	1721.75	25.7215	1728.92	17.2276	1695.49	41.472	1722.22	58.18
ZP01-41	64.288	121.78	0.527902	0.109473	0.00299706	4.96998	0.131591	0.327293	0.00318141	0.0916658	0.00196368	1790.43	50.0025	1814.23	22.4151	1825.25	15.4829	1772.71	36.3575	1790.43	50.0025
ZP01-199	208.592	496.852	0.419827	0.111678	0.00199948	5.37807	0.0961221	0.347314	0.00262011	0.102893	0.00177946	1827.78	32.2525	1881.37	15.3559	1921.76	12.5792	1979.51	32.6114	1827.78	32.2525
ZP01-16	103.385	260.863	0.396319	0.112619	0.00237201	5.18726	0.111586	0.331598	0.00257482	0.102089	0.00217706	1842.6	38.275	1850.53	18.3555	1846.12	12.5048	1964.78	39.9271	1842.6	38.275
ZP01-14	109.956	297.856	0.369158	0.113481	0.0026043	4.8604	0.108122	0.3085	0.00243087	0.0888425	0.0019477	1857.41	42.1325	1795.42	18.7731	1733.32	12.0124	1720.37	36.1553	1857.41	42.1325
ZP01-60	93.1447	584.133	0.159458	0.114974	0.00218372	5.38874	0.102308	0.33793	0.00251925	0.0975347	0.00201474	1879.32	28.855	1883.07	16.3105	1876.7	12.1805	1881.08	37.1035	1879.32	28.855
ZP01-70	218.771	351.793	0.621875	0.114918	0.00287073	4.42751	0.108089	0.278132	0.00333812	0.0604476	0.00203671	1879.63	45.5225	1717.5	20.2551	1581.95	16.8579	1186.28	38.82	1879.63	45.5225
ZP01-161	82.728	283.63	0.291676	0.115363	0.00289361	5.1588	0.127237	0.322319	0.00260628	0.0891103	0.00214872	1887.04	45.8375	1845.85	21.0147	1801.05	12.743	1725.34	39.8771	1887.04	45.8375
ZP01-34	30.1888	74.0843	0.407493	0.115889	0.00332575	5.364	0.150036	0.334824	0.003604	0.0948359	0.00285394	1894.44	51.8525	1879.13	23.9725	1861.72	17.4342	1831.32	52.6879	1894.44	51.8525
ZP01-77	45.66	745.739	0.0612278	0.116368	0.00258111	5.17303	0.119362	0.320681	0.00282138	0.0823706	0.00210076	1901.85	39.6625	1848.19	19.6737	1793.05	13.8055	1599.87	39.2297	1901.85	39.6625
ZP01-174	113.355	100.736	1.12527	0.116622	0.0030292	5.34308	0.138569	0.331308	0.00340015	0.0978669	0.00196028	1905.56	46.605	1875.78	22.2184	1844.72	16.4942	1887.2	36.0897	1905.56	46.605
ZP01-208	97.0223	301.923	0.321348	0.116884	0.0022138	5.71301	0.111988	0.35328	0.00330963	0.107992	0.00229054	1908.95	33.49	1933.34	16.9898	1950.24	15.8007	2072.75	41.7845	1908.95	33.49
ZP01-170	203.787	1015.99	0.20058	0.117176	0.00209996	4.99118	0.0914344	0.307556	0.00276679	0.0769809	0.00212429	1913.88	32.565	1817.83	15.5455	1728.67	13.6725	1498.97	39.8676	1913.88	32.565
ZP01-171	63.2139	131.457	0.48087	0.124909	0.00295361	5.73178	0.134386	0.331953	0.00330736	0.118521	0.00229371	2027.47	41.97	1936.17	20.3128	1847.84	16.0381	2263.92	41.4485	2027.47	41.97
ZP01-111	154.009	625.659	0.246155	0.128912	0.00376249	6.74141	0.265494	0.370919	0.00805223	0.0950517	0.00510924	2083.02	84.26	2078.07	34.8516	2033.73	37.8796	1835.3	94.3053	2083.02	84.26
ZP01-78	129.77	231.339	0.560952	0.130282	0.00297404	6.98717	0.159116	0.387211	0.00331992	0.110407	0.00218564	2101.54	40.59	2109.8	20.2787	2109.88	15.4698	2116.77	39.7841	2101.54	40.59
ZP01-93	208.841	292.137	0.714874	0.152754	0.00281083	9.35758	0.172788	0.440999	0.00394251	0.126648	0.00233066	2376.86	31.48	2373.68	17.0157	2355.11	17.6829	2410.25	41.8124	2376.86	31.48
ZP01-121	191.218	190.818	1.00209	0.160737	0.00488117	10.0354	0.311832	0.451107	0.0055189	0.120978	0.00312382	2464.81	50.4625	2438.05	28.7399	2400.17	24.5515	2308.26	56.3253	2464.81	50.4625
ZP01-181	74.5703	131.721	0.566124	0.163634	0.0040065	10.3133	0.254033	0.455463	0.00600642	0.163657	0.00543572	2494.45	74.23	2463.3	22.8613	2419.49	26.6352	3063.53	94.4161	2494.45	74.23
ZP01-62	101.009	162.778	0.620535	0.167688	0.00405931	10.758	0.262591	0.463445	0.0041927	0.135202	0.00273832	2534.87	40.7425	2502.44	22.7403	2454.75	18.5162	2563.12	48.7557	2534.87	40.7425
ZP01-118	131.894	141.506	0.932073	0.167687	0.00384465	10.9639	0.249084	0.471468	0.00445622	0.129514	0.0024524	2534.87	38.27	2520.07	21.2093	2490	19.5687	2461.6	43.8848	2534.87	38.27
ZP01-07	32.3287	42.3018	0.76424	0.170808	0.00592222	11.0661	0.355538	0.470384	0.00698211	0.0960206	0.00293614	2565.74	63.4275	2528.71	29.9685	2485.25	30.6402	1853.18	54.1467	2565.74	63.4275
ZP01-57	76.0781	280.8	0.270934	0.173418	0.00339552	9.81074	0.20311	0.40703	0.00462846	0.12951	0.00277296	2591.05	32.715	2417.16	19.1475	2201.33	21.239	2461.52	49.6213	2591.05	32.715
ZP01-06	30.9551	44.6535	0.693229	0.167553	0.00510902	9.33563	0.268104	0.402042	0.00485655	0.0904851	0.00321063	2600	51.2375	2371.53	26.3881	2178.43	22.3608	1750.84	59.5093	2600	51.2375
ZP01-72	128.845	324.926	0.396537	0.177975	0.00335562	11.8345	0.220992	0.478858	0.00366251	0.130403	0.00245165	2635.19	31.485	2591.4	17.572	2522.29	16.023	2477.5	43.8369	2635.19	31.485
