# Supplementary material for: Eocene-Oligocene terrestrial cryospheric processes: bipolar glaciation and uplifted Tibet
Source: Research Square preprint supplement (doi:10.21203/rs.3.rs-835656/v1), 2021-08-23
Supplement: Supplementary file 5 [file f60f510be5d0b8ac7324e2ab.xlsx]

## Sheet: Sheet1
Age	Thickness	samples ID	Lithology	SiO2	Al2O3	Fe2O3	MgO	CaO	Na2O	K2O	TiO2	P2O5	MnO	LOI	Sum	CIA
(Ma)	(M)			%	%	%	%	%	%	%	%	%	%	%	%
38.2985	20.9372	H1	Siltstone	72.084	10.489	4.986	1.857	1.55	0.109	3.113	0.768	0.109	0.047	5.123	100.235	73.7334
37.832	31.5647	H2	Argillaceous dolostone	19.136	7.603	3.214	13.499	20.048	0.659	1.74	0.423	0.032	0.092	33.343	99.789	65.2091
37.6354	36.0426	H3	Argillaceous dolostone	27.986	6.888	2.161	12.139	16.789	0.182	3.531	0.31	0.053	0.058	29.692	99.789	60.8569
37.1906	46.1733	H4	Dolomitic siltstone	59.583	12.409	5.557	3.243	3.953	0.292	4.732	0.723	0.083	0.053	9.228	99.856	67.0594
37.097	48.306	H5	Argillaceous dolostone	25.023	7.589	3.086	11.546	16.933	0.29	2.9	0.338	0.033	0.06	31.816	99.614	64.9187
36.9364	51.9648	H6	Arenaceous dolostone	41.548	7.287	3.06	8.936	12.562	0.273	2.994	0.407	0.05	0.064	22.669	99.85	63.7306
36.7984	55.109	H7	Argillaceous dolostone	27.992	8.785	3.123	11.654	15.263	0.289	3.765	0.44	0.034	0.066	28.521	99.932	63.5612
36.6665	58.1122	H8	Dolomitic siltstone	52.632	8.956	4.045	6.116	8.373	0.384	3.312	0.623	0.077	0.069	15.02	99.607	64.8358
36.5982	59.6697	H9	Arenaceous dolostone	38.47	10.716	4.025	7.94	11.411	0.309	4.885	0.56	0.048	0.106	21.316	99.786	62.9115
36.4908	62.1157	H10	Dolomitic siltstone	59.07	14.836	5.586	2.421	2.65	0.366	6.14	0.793	0.052	0.05	7.448	99.412	65.3487
36.3803	64.6332	H11	Argillaceous dolostone	31.914	9.305	4.321	9.944	14.398	0.246	4.081	0.433	0.038	0.072	24.785	99.537	63.9838
36.2837	66.833	H12	Dolomitic siltstone	54.656	12.11	5.22	4.608	5.454	0.248	4.558	0.635	0.051	0.067	11.843	99.45	67.7599
36.1738	69.3372	H13	Argillaceous dolostone	18.357	5.86	2.305	13.724	20.228	0.2	2.483	0.245	0.033	0.064	36.456	99.955	63.61
36.0572	71.9935	H14	Arenaceous dolostone	36.874	7.882	4.096	9.541	13.632	0.341	3.513	0.464	0.047	0.121	22.98	99.491	61.5014
35.993	73.4548	H15	Dolomitic siltstone	54.663	8.371	4.219	5.523	8.11	0.297	3.046	0.6	0.073	0.123	14.548	99.573	66.1558
35.9303	74.8825	H16	Dolostone	16.382	4.257	2.053	14.913	22.157	0.15	1.688	0.18	0.02	0.054	38.103	99.957	64.6743
35.8326	77.1092	H17	Argillaceous dolostone	27.489	7.375	3.26	10.934	16.391	0.158	3.357	0.302	0.031	0.059	30.222	99.578	63.9216
35.7626	78.7025	H18	Dolomitic siltstone	64.395	10.034	4.898	2.895	3.925	0.229	4.087	0.792	0.085	0.088	8.219	99.647	65.9164
35.696	80.2198	H19	Dolomitic siltstone	57.148	15.539	6.641	2.279	2.62	0.218	6.479	0.863	0.059	0.069	7.064	98.979	66.7291
35.6169	82.0235	H20	Argillaceous dolostone	24.616	6.337	2.738	11.844	17.608	0.161	1.956	0.269	0.045	0.056	34.163	99.793	70.4956
35.5226	84.1695	H21	Dolomitic siltstone	66.99	6.974	6.678	2.56	3.297	0.126	2.551	0.614	0.113	0.065	7.771	97.739	68.6641
35.4515	85.7897	H22	Dolomitic siltstone	54.537	12.345	3.89	4.107	5.41	0.326	6.31	0.636	0.053	0.063	11.739	99.416	60.9188
35.288	89.5135	H23	Dolostone	21.083	6.675	4.021	13.075	18.854	0.28	2.897	0.328	0.032	0.131	32.327	99.703	62.1517
35.21	91.2903	H24	Dolomitic siltstone	32.325	9.535	4.629	10.021	13.557	0.256	3.529	0.491	0.04	0.114	25.168	99.665	67.1164
35.0574	94.7679	H25	Dolostone	17.922	6.373	3.063	13.14	19.823	0.338	3.027	0.289	0.03	0.116	35.661	99.782	59.175
34.8465	99.5726	H26	Argillaceous dolostone	24.461	7.991	3.341	11.582	17.031	0.425	3.97	0.389	0.033	0.132	30.122	99.477	58.3401
34.6584	103.856	H27	Dolomitic siltstone	51.744	11.915	5.108	4.827	6.42	0.405	5.027	0.669	0.06	0.058	13.152	99.385	63.7084
34.4802	107.915	H28	Argillaceous dolostone	29.142	10.017	2.218	9.817	14.157	0.442	5.439	0.401	0.033	0.06	28.026	99.752	57.6577
34.0932	116.732	H29	Dolostone	19.894	5.993	2.485	13.241	19.478	0.287	3.22	0.258	0.026	0.064	34.798	99.744	57.4517
33.9841	119.216	H30	Dolomitic siltstone	62.625	8.746	5.207	3.646	5.138	0.495	2.622	0.589	0.077	0.101	10.002	99.248	66.158
33.9087	120.935	H31	Dolostone	23.225	5.925	2.678	12.436	18.855	0.322	3.295	0.238	0.027	0.057	32.524	99.582	56.1084
33.8497	122.278	H32	Arenaceous dolostone	31.316	6.822	3.517	10.344	17.057	0.994	2.059	0.301	0.042	0.088	27.309	99.849	55.3428
33.778	123.911	H33	Dolomitic siltstone	57.777	12.615	4.415	3.548	4.348	0.452	6.154	0.703	0.049	0.06	9.289	99.41	60.7075
33.7041	125.594	H34	Arenaceous dolostone	33.123	7.01	2.908	10.375	16.249	0.345	3.042	0.402	0.041	0.07	26.513	100.078	61.2438
33.6355	127.158	H35	Dolomitic siltstone	64.691	12.337	4.575	2.392	2.699	0.909	4.095	0.905	0.106	0.059	6.577	99.345	62.3982
33.5784	128.459	H36	Dolostone	15.692	4.016	2.211	15.192	22.555	0.252	2.048	0.208	0.024	0.044	37.663	99.905	56.8238
33.422	132.021	H37	Dolomitic siltstone	58.188	10.178	5.078	4.048	5.898	1.646	2.268	0.656	0.1	0.075	11.074	99.209	56.3725
33.237	136.235	H38	Dolostone	25.81	5.187	2.457	12.903	18.671	0.29	2.676	0.267	0.031	0.046	31.521	99.859	57.347
33.0453	140.601	H39	Dolomitic siltstone	53.98	9.038	4.905	6.062	7.176	1.118	2.558	0.61	0.097	0.117	13.91	99.571	58.3387
32.9417	142.962	H40	Dolostone bearing mudstone	52.054	18.572	7.037	3.304	2.362	1.472	5.191	0.763	0.075	0.048	8.346	99.224	63.9352
32.7945	146.314	H41	Dolostone	13.539	4.084	3.107	15.924	23.787	0.255	1.515	0.199	0.021	0.068	37.825	100.324	62.19
32.6371	149.902	H42	Dolomitc argillaceous limestone	20.721	4.876	1.958	3.458	34.493	0.081	1.363	0.272	0.161	0.08	31.968	99.431	73.6387
32.4741	153.614	H43	Dolostone	23.03	5.123	2.664	13.139	20.238	0.366	2.538	0.264	0.031	0.065	32.501	99.959	56.4129
32.3503	156.434	H44	Dolomitic siltstone	51.924	12.92	6.045	4.406	5.949	1.398	3.643	0.748	0.073	0.071	12.07	99.247	60.1688
32.2563	158.575	H45	Dolostone	12.516	4.454	1.761	15.108	23.581	0.264	2.618	0.175	0.027	0.049	39.523	100.076	54.5602
32.1844	160.213	H46	Dolomitic siltstone	62.724	10.62	4.609	3.232	4.228	0.777	3.997	0.782	0.099	0.078	8.203	99.349	60.6381
32.1078	161.957	H47	Argillaceous dolostone	25.003	6.611	2.346	11.491	16.963	1.126	2.103	0.292	0.031	0.056	34.087	100.109	52.4771
32.0471	163.34	H48	Dolomitic siltstone	40.572	12.098	4.844	7.138	10.243	0.651	4.91	0.544	0.044	0.103	18.439	99.586	61.8258
31.9357	165.877	H49	Argillaceous dolostone	31.938	10.588	4.293	8.754	14.162	1.019	4.606	0.356	0.029	0.146	23.966	99.857	55.9063
31.8482	167.871	H50	Dolomitic siltstone	59.934	13.382	5.271	2.833	3.644	2.108	3.343	0.76	0.083	0.072	8.58	100.01	55.8852
31.7755	169.527	H51	Argillaceous dolostone	38.704	13.022	3.961	6.903	10.804	1.491	4.825	0.412	0.032	0.103	19.114	99.371	56.2177
31.725	170.678	H52	Dolomitic siltstone	40.775	11.001	3.592	7.773	11.603	0.752	4.216	0.511	0.047	0.108	19.935	100.313	60.9469
31.6654	172.036	H53	Argillaceous dolostone	30.662	7.904	3.542	8.645	14.076	0.779	2.507	0.351	0.05	0.062	31.342	99.92	59.9354
31.6031	173.455	H54	Dolomitic siltstone	38.994	12.429	5.08	8.003	10.499	0.78	4.047	0.478	0.049	0.102	19.034	99.495	64.1104
31.5482	174.706	H55	Argillaceous dolostone	40.299	12.95	5.185	7.085	10.26	1.068	4.361	0.455	0.053	0.116	18.032	99.864	61.0958
31.4962	175.89	H56	Calcareous siltstone	50.225	15.292	6.078	3.735	6.804	1.05	4.764	0.654	0.093	0.1	10.524	99.319	63.9397
31.4479	176.991	H57	Argillaceous dolostone	28.499	8.768	3.531	11.285	15.839	0.516	3.652	0.266	0.044	0.124	27.105	99.629	60.7681
31.3921	178.262	H58	Dolomitic-argillaceous siltstone	59.617	13.816	5.687	4.599	3.138	1.115	4.269	0.763	0.124	0.093	7.129	100.35	62.4677
31.3337	179.591	H59	Dolostone	11.996	2.742	2.774	14.503	27.281	0.204	1.307	0.114	0.024	0.055	39.253	100.253	56.753
31.2907	180.571	H60	Dolomitic-argillaceous siltstone	68.417	8.987	6.017	3.47	2.535	0.871	2.729	0.646	0.105	0.066	6.119	99.962	60.6651
31.2478	181.549	H61	Argillaceous dolostone	43.515	14.254	4.658	6.806	8.705	0.84	4.192	0.513	0.054	0.094	16.573	100.204	66.0928
31.1857	182.963	H62	Dolomitic siltstone	29.986	10.005	5.908	10.119	14.798	0.402	3.06	0.372	0.05	0.153	24.688	99.541	68.3022
31.1408	183.986	H63	Dolomitic mudstone	47.991	17.424	6.412	4.552	5.849	0.516	4.55	0.68	0.079	0.089	11.105	99.247	72.4218
31.0731	185.528	H64	Dolomitic mudstone	34.193	10.413	4.899	8.964	13.747	1.183	3.093	0.429	0.06	0.11	22.912	100.003	58.9581
31	187.193	H65	Dolostone	7.977	3.237	2.597	17.104	26.297	0.454	0.906	0.146	0.025	0.075	41.148	99.966	56.6512
30.708	193.844	H66	Dolomitic mudstone	47.581	13.567	5.281	5.435	7.73	1.449	3.479	0.609	0.131	0.079	14.448	99.949	61.0566
30.4529	199.655	H67	Dolostone	22.223	5.604	2.561	13.011	21.347	1.03	1.39	0.269	0.06	0.088	32.656	100.239	53.3647
