# Supplementary material for: Eocene-Oligocene terrestrial cryospheric processes: bipolar glaciation and uplifted Tibet
Source: Research Square preprint supplement (doi:10.21203/rs.3.rs-835656/v1), 2021-08-23
Supplement: Supplementary file 6 [file 81d7ef95c2200bc998208585.xlsx]

## Sheet: Sheet1
Age	Thickness	samples ID	Lithology	smectite	illite	kaolinite	Chlorite	I/S	Ch/S	(Smectite+I/S)/Illite	La/Th	Th/Sc
(Ma)	(M)			%	%	%	%	%	%
38.2985	20.9372	H1	Siltstone	0	90.6469	9.35308	0	0	0	0	1.84074	0.930648
37.832	31.5647	H2	Argillaceous dolostone	0	94.9367	5.06329	0	0	0	0	2.06803	0.661819
37.6354	36.0426	H3	Argillaceous dolostone	0	45.1613	8.60215	0	46.2366	0	1.02381	4.12001	0.23805
37.1906	46.1733	H4	Dolomitic siltstone	0	83.2761	1.89596	0.394992	14.433	0	0.173315	6.51722	0.744903
37.097	48.306	H5	Argillaceous dolostone	0	72.3127	27.6873	0	0	0	0	1.50452	0.507175
36.9364	51.9648	H6	Arenaceous dolostone	0	80.8105	5.95948	0	0	13.23	0	2.03286	0.794985
36.7984	55.109	H7	Argillaceous dolostone	0	49.7297	1.8018	0	48.4685	0	0.974638	1.8696	0.54223
36.6665	58.1122	H8	Dolomitic siltstone	0	81.9042	5.42245	0	12.6734	0	0.154734	2.35433	0.856569
36.5982	59.6697	H9	Arenaceous dolostone	0	86.5	1.47783	0	0	12	0	1.93696	0.499414
36.4908	62.1157	H10	Dolomitic siltstone	0	79.5756	0	0	20.4244	0	0.256667	1.91188	0.792421
36.3803	64.6332	H11	Argillaceous dolostone	0	80.3366	2.44836	0	17.215	0	0.214286	1.78326	0.475585
36.2837	66.833	H12	Dolomitic siltstone	0	70.9378	0	0	29.0622	0	0.409686	1.24456	0.411779
36.1738	69.3372	H13	Argillaceous dolostone	0	70.4861	2.77778	0	26.7361	0	0.37931	3.11106	0.415176
36.0572	71.9935	H14	Arenaceous dolostone	0	76.5366	0	0	23.4634	0	0.306565	2.46315	0.353615
35.993	73.4548	H15	Dolomitic siltstone	0	77.8333	0	0	22.1667	0	0.284797	1.41705	0.717796
35.9303	74.8825	H16	Dolostone	0	79.2593	0	0	20.7407	0	0.261682	2.93815	0.280537
35.8326	77.1092	H17	Argillaceous dolostone	0	80.6897	0	0	19.3103	0	0.239316	2.10555	0.385263
35.7626	78.7025	H18	Dolomitic siltstone	0	81.0494	1.45707	0.971379	16.5221	0	0.203852	1.41327	0.650084
35.696	80.2198	H19	Dolomitic siltstone	0	78.6667	0	0	21.3333	0	0.271186	2.99243	0.816678
35.6169	82.0235	H20	Argillaceous dolostone	0	49.505	21.2376	5	24.2574	0	0.49	2.69156	0.663227
35.5226	84.1695	H21	Dolomitic siltstone	0	64.1129	7.84739	1.4268	26.6129	0	0.415094	5.30554	1.22491
35.4515	85.7897	H22	Dolomitic siltstone	0	64.0146	0	0	35.9854	0	0.562144	3.3237	0.837685
35.288	89.5135	H23	Dolostone	0	68.0502	4.44015	0	27.5097	0	0.404255	3.18675	0.269909
35.21	91.2903	H24	Dolomitic siltstone	0	55.1064	4.25532	0	40.6383	0	0.737452	1.98244	0.34906
35.0574	94.7679	H25	Dolostone	0	59	0	0	41	0	0.694915	3.15137	0.42577
34.8465	99.5726	H26	Argillaceous dolostone	0	54.7619	4.7619	0	40.4762	0	0.73913	2.76254	0.320867
34.6584	103.856	H27	Dolomitic siltstone	0	42.7723	0.792079	0	56.4356	0	1.31944	2.62319	0.569227
34.4802	107.915	H28	Argillaceous dolostone	0	72.0339	0	0	27.9661	0	0.388235	2.04276	0.504159
34.0932	116.732	H29	Dolostone	0	53.4884	0	0	46.5116	0	0.869565	2.61349	0.290135
33.9841	119.216	H30	Dolomitic siltstone	83.6781	13.2838	2.129	0.90914	0	0	6.29927	4.38485	0.657305
33.9087	120.935	H31	Dolostone	0	82.3529	0	0	17.6471	0	0.214286	2.31121	0.627454
33.8497	122.278	H32	Arenaceous dolostone	0	17.3333	0	0	82.6667	0	4.76923	3.31828	0.756696
33.778	123.911	H33	Dolomitic siltstone	0	70.625	0	0	29.375	0	0.415929	6.14426	0.760247
33.7041	125.594	H34	Arenaceous dolostone	0	22.6415	0	0	77.3585	0	3.41667	1.51276	0.492377
33.6355	127.158	H35	Dolomitic siltstone	0	17.25	0	0	82.75	0	4.7971	2.07474	0.822196
33.5784	128.459	H36	Dolostone	0	75	2.5	0	22.5	0	0.3	2.50697	0.226396
33.422	132.021	H37	Dolomitic siltstone	0	19.6739	0	0	80.3261	0	4.08287	1.9761	1.10871
33.237	136.235	H38	Dolostone	0	21.2	0	0	78.8	0	3.71698	3.24146	0.337987
33.0453	140.601	H39	Dolomitic siltstone	0	16	0	0	84	0	5.25	3.98056	0.623586
32.9417	142.962	H40	Dolostone bearing mudstone	0	23.9597	1.34228	0	74.698	0	3.11765	2.05666	1.15675
32.7945	146.314	H41	Dolostone	0	16.0465	0	0	83.9535	0	5.23188	2.60402	0.260687
32.6371	149.902	H42	Dolomitc argillaceous limestone	0	74.5856	7.79436	2.70288	14.9171	0	0.2	3.54442	1.03013
32.4741	153.614	H43	Dolostone	0	25.7407	0	0	74.2593	0	2.88489	1.35831	0.836667
32.3503	156.434	H44	Dolomitic siltstone	0	32.4792	0	0.938289	66.5825	0	2.05	2.19983	0.923582
32.2563	158.575	H45	Dolostone	0	83.3333	0	0	16.6667	0	0.2	1.45356	1.18826
32.1844	160.213	H46	Dolomitic siltstone	0	28.8008	0	1.7038	69.4954	0	2.41297	2.14849	0.72017
32.1078	161.957	H47	Argillaceous dolostone	0	37.6667	0	0	62.3333	0	1.65487	2.21089	0.348734
32.0471	163.34	H48	Dolomitic siltstone	0	24.9	0	0	75.1	0	3.01606	3.5069	0.4685
31.9357	165.877	H49	Argillaceous dolostone	0	35.8491	0	0	64.1509	0	1.78947	3.48867	0.295943
31.8482	167.871	H50	Dolomitic siltstone	0	24.6154	0	0	75.3846	0	3.0625	2.7901	0.999377
31.7755	169.527	H51	Argillaceous dolostone	0	40	0	0	60	0	1.5	3.50827	0.551836
31.725	170.678	H52	Dolomitic siltstone	0	32.9154	0	3.60502	63.4796	0	1.92857	2.82379	0.741083
31.6654	172.036	H53	Argillaceous dolostone	0	36.5625	0	3.57143	59.8661	0	1.63736	1.77297	1.19049
31.6031	173.455	H54	Dolomitic siltstone	0	18.8857	0	2.83286	78.2814	0	4.145	2.63726	0.730339
31.5482	174.706	H55	Argillaceous dolostone	0	23.9658	0.87667	2.83232	72.3252	0	3.01786	2.71219	0.810322
31.4962	175.89	H56	Calcareous siltstone	0	23.8598	0	1.55729	74.5829	0	3.12587	2.66288	0.959578
31.4479	176.991	H57	Argillaceous dolostone	0	21.6495	0	2.26804	76.0825	0	3.51429	3.77562	0.328087
31.3921	178.262	H58	Dolomitic-argillaceous siltstone	89.8917	9.02323	0	1.08505	0	0	9.96226	2.63479	0.979806
31.3337	179.591	H59	Dolostone	94.92	5.08001	0	0	0	0	18.685	3.04052	0.412975
31.2907	180.571	H60	Dolomitic-argillaceous siltstone	78.9137	19.1693	0	1.91693	0	0	4.11667	2.30453	1.60194
31.2478	181.549	H61	Argillaceous dolostone	0	24.3124	0	2.75049	72.9371	0	3	2.33289	1.0405
31.1857	182.963	H62	Dolomitic siltstone	0	29.8805	0	3.78486	66.3347	0	2.22	2.59388	0.594208
31.1408	183.986	H63	Dolomitic mudstone	0	31.803	0	4.8414	63.3556	0	1.99213	2.26862	1.10205
31.0731	185.528	H64	Dolomitic mudstone	0	46.1677	0	2.99401	50.8383	0	1.10117	2.51959	0.891625
31	187.193	H65	Dolostone	0	55.7692	0	3.84615	40.3846	0	0.724138	2.1006	0.372479
30.708	193.844	H66	Dolomitic mudstone	0	46.6667	0	0	53.3333	0	1.14286	2.52415	1.00259
30.4529	199.655	H67	Dolostone	0	60.4167	0	0	39.5833	0	0.655172	2.90359	0.780779
