# Supplementary material for: Eocene-Oligocene terrestrial cryospheric processes: bipolar glaciation and uplifted Tibet
Source: Research Square preprint supplement (doi:10.21203/rs.3.rs-835656/v1), 2021-08-23
Supplement: Supplementary file 7 [file d1405974ecd4c7d44964a3ac.xlsx]

## Sheet: Sheet1
Age	Thickness	samples ID	Lithology	type of ice-related structure	quartz	feldspar	dolomite	calcite	magnesite	Analcite	other	Total clay
(Ma)	(M)				(%)	(%)	(%)	(%)	(%)	(%)	(%)	(%)
38.2985	20.9372	H1	Siltstone		53.1306	1.15438	3.54185	0	0	0	0.5	41.6732
37.832	31.5647	H2	Argillaceous dolostone	IRDs	6.40179	0	71.4378	0	0	4.25473	0.5	17.4057
37.6354	36.0426	H3	Argillaceous dolostone		11.3619	6.14978	70.5579	0	0	0	0.5	11.4304
37.1906	46.1733	H4	Dolomitic siltstone		46.695	7.58012	17.5164	0	0	0	0.5	27.7085
37.097	48.306	H5	Argillaceous dolostone		11.1304	4.47501	68.0996	0	0	0	0.5	15.795
36.9364	51.9648	H6	Arenaceous dolostone	IRDs and glendonites	25.1363	6.6643	50.2806	0	0	0	0.5	17.4188
36.7984	55.109	H7	Argillaceous dolostone		10.9764	7.00702	61.2823	0	3.9472	0	0.5	16.2871
36.6665	58.1122	H8	Dolomitic siltstone		39.0769	6.59702	32.2459	0	0	0	0.5	21.5802
36.5982	59.6697	H9	Arenaceous dolostone		21.969	9.81717	45.3996	0	0.706147	0	0.5	21.6081
36.4908	62.1157	H10	Dolomitic siltstone		41.3125	10.5078	13.6063	0	0	0	0.5	34.0734
36.3803	64.6332	H11	Argillaceous dolostone	frost marks	17.067	7.66633	48.9615	0	2.91036	0	0.5	22.8949
36.2837	66.833	H12	Dolomitic siltstone		36.7028	5.9516	22.2023	0	1.36556	0	0.5	33.2777
36.1738	69.3372	H13	Argillaceous dolostone		7.18458	4.44526	73.6519	0	0	0	0.5	14.2183
36.0572	71.9935	H14	Arenaceous dolostone	frost marks, IRDs and glendonites	20.6322	7.55801	56.6924	0	0	0	0.5	14.6175
35.993	73.4548	H15	Dolomitic siltstone		43.707	5.7577	28.6462	0	0	0	0.5	21.3891
35.9303	74.8825	H16	Dolostone	frost marks, IRDs and glendonites	7.7731	1.98393	81.7857	0	0	0	0.5	7.9573
35.8326	77.1092	H17	Argillaceous dolostone	frost marks	16.064	4.62402	62.2823	0	0.825307	0	0.5	15.7044
35.7626	78.7025	H18	Dolomitic siltstone		53.7482	7.77323	15.7345	0	0	0	0.589903	22.1541
35.696	80.2198	H19	Dolomitic siltstone		38.6571	16.733	12.2985	0	0	0	0.947566	31.3638
35.6169	82.0235	H20	Argillaceous dolostone	frost marks, IRDs and glendonites	17.5093	3.08822	63.8536	0	0	0	0.5	15.0488
35.5226	84.1695	H21	Dolomitic siltstone		63.5049	4.61241	14.8562	0	0	0	0.973552	16.053
35.4515	85.7897	H22	Dolomitic siltstone		33.8706	14.8775	27.0242	0	0	0	0.514498	23.7132
35.288	89.5135	H23	Dolostone	frost marks	8.0328	5.43388	74.9452	0	0	0	0.5	11.0881
35.21	91.2903	H24	Dolomitic siltstone		16.1175	6.52354	50.2792	0	0	0	0.51142	26.5684
35.0574	94.7679	H25	Dolostone	frost marks and IRDs	2.90332	6.69604	75.91	1.86642	0	0	0.5	12.1242
34.8465	99.5726	H26	Argillaceous dolostone	frost marks	7.53706	9.97999	67.4885	0	0	0	0.592511	14.4019
34.6584	103.856	H27	Dolomitic siltstone		31.5821	11.3415	30.1163	0	0	0	0.5	26.46
34.4802	107.915	H28	Argillaceous dolostone	frost marks	5.10384	12.091	68.0058	0	0	0	0.532558	14.2667
34.0932	116.732	H29	Dolostone	frost marks	5.6679	4.71704	79.7468	0	0	0	0.5	9.3683
33.9841	119.216	H30	Dolomitic siltstone		49.4605	7.56349	19.1013	0	0	0	0.5	23.3747
33.9087	120.935	H31	Dolostone	frost marks	8.9751	2.98609	79.5855	0	0	0	0.5	7.95332
33.8497	122.278	H32	Arenaceous dolostone	frost marks and IRDs	17.8502	7.12728	59.7803	0	0	0	0.5	14.7422
33.778	123.911	H33	Dolomitic siltstone		39.1163	16.0032	20.5998	0	0	0	0.5	23.7806
33.7041	125.594	H34	Arenaceous dolostone	frost marks	17.2789	5.48909	65.3256	0	0	0	0.5	11.4064
33.6355	127.158	H35	Dolomitic siltstone		44.7429	12.9928	16.4686	0	0	0	0.5	25.2958
33.5784	128.459	H36	Dolostone	frost marks	6.2567	2.95572	82.6857	0	0	0	0.5	7.60189
33.422	132.021	H37	Dolomitic siltstone		41.5957	8.34415	21.7125	0	0	5.00551	0.5	22.8421
33.237	136.235	H38	Dolostone	frost marks	13.544	4.18904	74.2066	0	0	0	0.5	7.56031
33.0453	140.601	H39	Dolomitic siltstone		34.8716	8.76889	23.6939	0	2.28364	2.3591	0.5	27.5228
32.9417	142.962	H40	Dolostone bearing mudstone		13.3167	8.05288	6.9453	0	0	6.41746	0.834694	64.433
32.7945	146.314	H41	Dolostone	frost marks and IRDs	1.58112	2.52047	84.279	0	0	0	0.5	11.1194
32.6371	149.902	H42	Dolomitc argillaceous limestone		12.743	0	12.7519	59.0868	0	0	0.5	14.5875
32.4741	153.614	H43	Dolostone	frost marks and IRDs	7.69117	5.02004	78.7972	0	0	0.608055	0.5	7.38352
32.3503	156.434	H44	Dolomitic siltstone		25.7707	7.59251	19.5328	0	0	6.47278	0.5	40.1312
32.2563	158.575	H45	Dolostone		0	4.02133	89.4467	0	0	0	0.5	6.03199
32.1844	160.213	H46	Dolomitic siltstone		50.4776	11.2383	17.9039	0	0	0	0.5	19.8801
32.1078	161.957	H47	Argillaceous dolostone		11.8503	5.3053	64.4157	0	0	5.62469	0.5	12.304
32.0471	163.34	H48	Dolomitic siltstone		14.5749	10.6721	43.434	0	0	1.54648	0.5	29.2726
31.9357	165.877	H49	Argillaceous dolostone		8.32416	10.7673	54.8367	0	0	5.59384	0.5	19.978
31.8482	167.871	H50	Dolomitic siltstone		39.5985	6.95324	12.0771	0	0	10.2429	0.5	30.6283
31.7755	169.527	H51	Argillaceous dolostone		11.4808	8.22833	43.9399	0	0	9.16415	0.5	26.6868
31.725	170.678	H52	Dolomitic siltstone		21.5687	7.91885	45.348	0	0	2.28375	0.5	22.3807
31.6654	172.036	H53	Argillaceous dolostone		16.0713	9.00576	51.8295	0	0	0	0.5	22.5935
31.6031	173.455	H54	Dolomitic siltstone		16.1311	8.56967	42.038	0	0	2.80751	0.5	29.9537
31.5482	174.706	H55	Argillaceous dolostone		13.1281	7.86592	38.7096	0	0	4.61084	0.5	35.1855
31.4962	175.89	H56	Calcareous siltstone		21.0181	11.8831	6.5484	12.5223	0	3.89584	0.5	43.6322
31.4479	176.991	H57	Argillaceous dolostone		9.1218	10.9243	64.088	0	0	0	0.5	15.3659
31.3921	178.262	H58	Dolomitic-argillaceous siltstone		43.3069	15.3239	9.39307	1.16531	0	0	0.5	30.3108
31.3337	179.591	H59	Dolostone		2.44307	0	87.2117	6.69473	0	0	0.5	3.15046
31.2907	180.571	H60	Dolomitic-argillaceous siltstone		60.1216	9.55293	9.84352	0	0	0.44805	0.5	19.5339
31.2478	181.549	H61	Argillaceous dolostone		8.99934	4.87056	50.7472	0	0	0.533172	0.5	34.3498
31.1857	182.963	H62	Dolomitic siltstone		19.3892	7.61381	32.4616	0	0	3.25739	0.5	36.778
31.1408	183.986	H63	Dolomitic mudstone		14.8049	5.39887	47.707	0	0	5.53144	0.5	26.0578
31.0731	185.528	H64	Dolomitic mudstone		16.911	7.35424	9.38254	7.83858	0	0	0.5	58.0136
31	187.193	H65	Dolostone		0.912618	1.09514	92.7612	0	0	1.577	0.5	3.15401
30.708	193.844	H66	Dolomitic mudstone		23.7902	4.92055	26.0598	0	0	6.98718	0.8	36.9041
30.4529	199.655	H67	Dolostone		10.7406	5.65593	70.1565	0	0	3.9664	0.5	8.98054
